# Supplementary material
Source: publisher figshare collection journal article supplement (https://acs.figshare.com/ndownloader/files/3787678)
Supplement: Supplementary file 1 [file 3787678]

# Facile One-step Synthesis of Three-dimensional Pd-Ag Bimetallic Alloy Networks and Their Electrocatalytic Activity toward Ethanol Oxidation

*Shaofang Fu,<sup>1</sup> Chengzhou Zhu,<sup>1</sup> Dan Du,<sup>1</sup> Yuehe Lin<sup>\*12</sup>*

<sup>1</sup> Department of Mechanical and Material Engineering, Washington State University, Pullman, WA 99164, USA.

<sup>2</sup> Pacific Northwest National Laboratory, Richland, WA 99352, USA.

Corresponding author:

Email: [yuehelin@wsu.edu](mailto:yuehelin@wsu.edu)

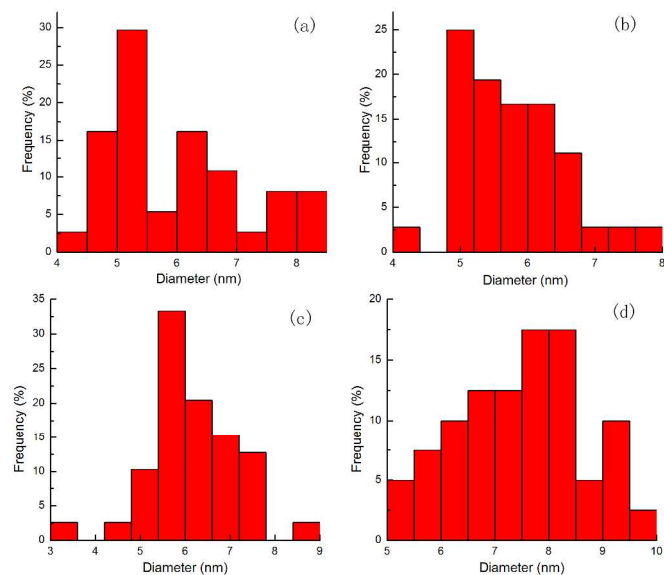

Figure S1. Size distribution of Pd NWs (a), Pd<sub>67</sub>Ag<sub>33</sub> (b), and Pd<sub>50</sub>Ag<sub>50</sub> (c) BANWs. (d) Size distribution of Pd<sub>50</sub>Ag<sub>50</sub> BANWs after test.

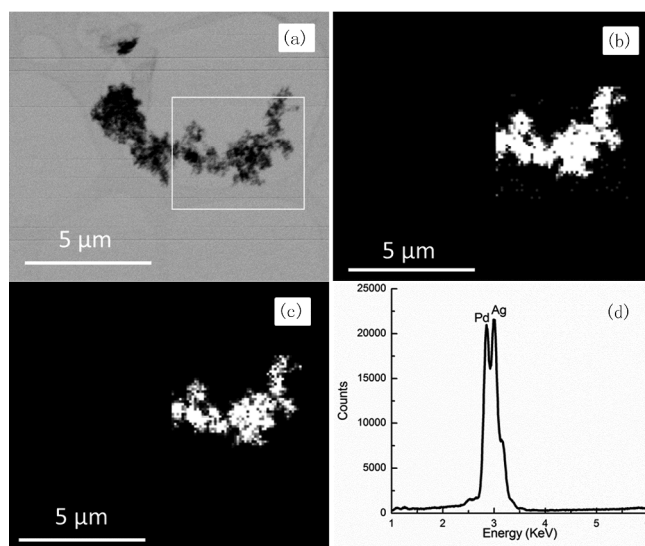

Figure S2. (a) TEM image of 3D Pd<sub>67</sub>Ag<sub>33</sub> BANWs and related element mapping of Pd (b) and Ag (c). (d) EDX spectrum of Pd<sub>67</sub>Ag<sub>33</sub> BANWs.

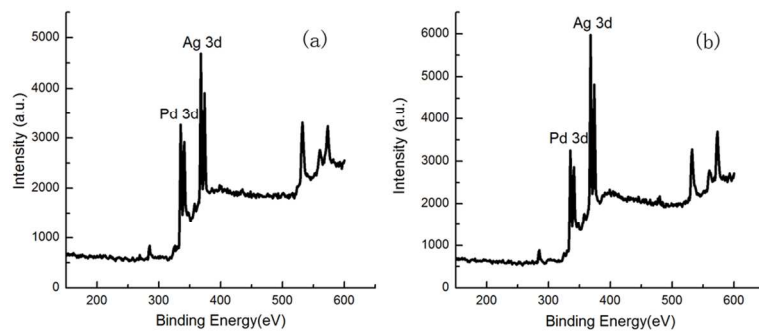

Figure S3. (a) XPS spectra of  $\text{Pd}_{67}\text{Ag}_{33}$  BANWs. (b) XPS spectra of  $\text{Pd}_{50}\text{Ag}_{50}$  BANWs.
